# Supplementary material for: A cell-free platform for the prenylation of natural products and application to cannabinoid production
Source: Springer Nature journal article supplement (doi:10.1038/s41467-019-08448-y), 2019-02-04
Supplement: MOESM1 [file 41467_2019_8448_MOESM1_ESM.pdf]

**A cell-free biosynthetic platform for the prenylation of natural products with  
applications to cannabinoid production**

*Valliere et al.*

Supplementary Table 1: Enzymes used in the enzymatic platform.

|            | <b>Enzyme Abb.</b> | <b>Full Name</b>                            | <b>Organism</b>               | <b>Amount Added to Rxn (mg/mL)</b> | <b>Acquisition Number</b> |
|------------|--------------------|---------------------------------------------|-------------------------------|------------------------------------|---------------------------|
| <b>1</b>   | Hex                | Hexokinase                                  | <i>S. cerevisiae</i>          | 0.02                               | Sigma Aldrich             |
| <b>2</b>   | Pgi                | Glucose-6-phosphate isomerase               | <i>G. thermodenitrificans</i> | 0.48                               | ABO6822                   |
| <b>3</b>   | PfkA               | Phosphofructokinase                         | <i>G. stearothermophilus</i>  | 0.18                               | KOR92562                  |
| <b>4</b>   | Fba                | Fructose-1,6-bisphosphate aldolase          | <i>S. aureus</i>              | 0.03                               | BAR10119                  |
| <b>5</b>   | TpiA               | Triose phosphate isomerase                  | <i>G. stearothermophilus</i>  | 0.16                               | KOR95273                  |
| <b>6</b>   | Gap                | Gald-3-P dehydrogenase                      | <i>E. coli K12</i>            | 0.07                               | NP_416293                 |
| <b>7</b>   | mGap               | Gald-3-P dehydrogenase D34A/L35R/T36K       | <i>G. stearothermophilus</i>  | 0.18                               | NP_416293                 |
| <b>8</b>   | NoxE               | NADH Oxidase                                | <i>L. lactis</i>              | 0.25                               | WP_015425842              |
| <b>9</b>   | Pgk                | Phosphoglycerate Kinase                     | <i>G. stearothermophilus</i>  | 0.06                               | NP_415276                 |
| <b>10</b>  | dPgm               | Phosphoglycerate Mutase (2,3 BPG dependent) | <i>E. coli K12</i>            | 0.29                               | NP_417259                 |
| <b>11</b>  | Eno                | Enolase                                     | <i>E. coli K12</i>            | 0.08                               | KOR95272                  |
| <b>12</b>  | PykF               | Pyruvate Kinase (FBP dependent)             | <i>E. coli K12</i>            | 0.37                               | NP_416191                 |
|            | PDH                | Pyruvate Dehydrogenase                      | <i>E. coli K12</i>            | 0.99                               |                           |
|            |                    | AceE                                        |                               |                                    | NP_414656                 |
|            |                    | AceF                                        |                               |                                    | NP_414657                 |
|            |                    | Lpd                                         |                               |                                    | NP_414658                 |
| <b>13</b>  | PyOx               | Pyruvate Oxidase                            | <i>A. viridans</i>            | 1 U                                | AG Scientific             |
| <b>14</b>  | PTA                | Acetyl-phosphate transferase                | <i>G. stearothermophilus</i>  | 0.06                               | WP_053532564              |
| <b>15</b>  | PhaA               | Acetyl-CoA acetyltransferase                | <i>R. eutropha</i>            | 0.12                               | CAJ92573                  |
| <b>16</b>  | HMGS A110G         | HMG-CoA Synthase A110G                      | <i>E. faecalis</i>            | 0.18                               | WP_010785222              |
| <b>17</b>  | HMGR               | HMG-CoA Reductase                           | <i>E. faecalis</i>            | 0.16                               | AAG02439                  |
| <b>18</b>  | MVK                | Mevalonate Kinase                           | <i>M. mazei</i>               | 0.14                               | AAM31458                  |
| <b>19</b>  | PMVK               | Phosphomevalonate Kinase                    | <i>S. pneumonia</i>           | 0.2                                | WP_000562411              |
| <b>20</b>  | MDC                | Diphosphomevalonate Kinase                  | <i>S. pneumonia</i>           | 0.19                               | NP_357933                 |
| <b>21</b>  | IDI                | Isopentyl-PP Isomerase                      | <i>E. coli K12</i>            | 0.3                                | NP_417365                 |
| <b>22</b>  | FPPS S82F          | Farnesyl-PP synthase S82F                   | <i>G. stearothermophilus</i>  | 0.09                               | KOR95521                  |
| <b>23</b>  | NphB               | Aromatic prenyltransferase                  | <i>Streptomyces sp. CL190</i> | Variable                           | BAE00106.1                |
| <b>24B</b> | CBDAS              | Cannabidiolic Acid Synthase                 | <i>C. sativa</i>              |                                    | AKC34419                  |
| <b>25</b>  | Ppase              | Pyrophosphatase                             | <i>G. stearothermophilus</i>  | 0.11                               | O05724                    |
| <b>26</b>  | Cat                | Catalase                                    | <i>C. glutamicum</i>          | 0.1 U                              | Sigma Aldrich             |
|            | GorA               | Glutathione Reductase                       | <i>E. coli K12</i>            | 0.06                               | NP_417957                 |

The cells highlighted in yellow indicate proteins that were only added to the PDH reactions and not to the PyOx/PTA reactions



Supplementary Table 4: NphB mutants.

| <b>Construct Name</b> | <b>Mutations</b>                        |
|-----------------------|-----------------------------------------|
| <b>M1</b>             | Y288A                                   |
| <b>M2</b>             | Y288N                                   |
| <b>M3</b>             | Y288A, F213H                            |
| <b>M4</b>             | Y288A, F213N                            |
| <b>M5</b>             | Y288N, V49S                             |
| <b>M6</b>             | Y288S, V49N                             |
| <b>M7</b>             | Y288A, V49S                             |
| <b>M8</b>             | Y288N, V49T                             |
| <b>M9</b>             | Y288N, I234T                            |
| <b>M10</b>            | Y288N, G286S                            |
| <b>M11</b>            | Y288N, F213N, V49G                      |
| <b>M12</b>            | Y288A, F213N, I234T                     |
| <b>M13</b>            | Y288S, F213N, V49N                      |
| <b>M14</b>            | Y288N, F213G, I234T                     |
| <b>M15</b>            | Y288A, F213N, A232S                     |
| <b>M16</b>            | Y288N, F213N, A232S                     |
| <b>M17</b>            | Y288N, F213G, V49T                      |
| <b>M18</b>            | Y288N, V49S, V271N                      |
| <b>M19</b>            | Y288N, F213N, V49S, V271N               |
| <b>M20</b>            | Y288N, F213G, V49T, V271H               |
| <b>M21</b>            | Y288N, F213N, V49S, I234T, A232S, V271N |
| <b>M22</b>            | Y288N, F213G, V49T, I234T, V271H, L298I |
| <b>M23*</b>           | Y288A, G286S                            |
| <b>M24*</b>           | Y288A, G286S, A232S                     |
| <b>M25*</b>           | Y288A, G286S, A232S, F213H              |
| <b>M27*</b>           | Y288V, G286S                            |
| <b>M28*</b>           | Y288V, G286S, A232S                     |
| <b>M30*</b>           | Y288A, A232S                            |
| <b>M31*</b>           | Y288V, A232S                            |

The NphB construct name, and the amino acid mutations are shown above. The asterisk (\*) denotes constructs that were added after the first round was screened.

Supplementary Table 5: Kinetic parameters for NphB mutants.

| Construct | $k_{cat}$ ( $\text{min}^{-1}$ )               | $K_M$ (mM)                           | $k_{cat}/K_M$ ( $\text{min}^{-1} \text{mM}^{-1}$ ) |
|-----------|-----------------------------------------------|--------------------------------------|----------------------------------------------------|
| WT NphB   | $0.0021 \pm 0.00008$<br>$0.0047 \pm 0.0003^b$ | $0.64 \pm 0.08$<br>$0.88 \pm 0.2^b$  | $0.0033 \pm 0.0005$<br>$0.005 \pm 0.001^b$         |
| NphB M1   | $0.061 \pm 0.003$                             | $0.58 \pm 0.11$                      | $0.11 \pm 0.02$                                    |
| NphB M10  | $0.79 \pm 0.02$                               | $0.34 \pm 0.02$                      | $2.4 \pm 0.2$                                      |
| NphB M23  | $1.58 \pm 0.05$<br>$0.48 \pm 0.07^b$          | $0.45 \pm 0.05$<br>$2.4 \pm 0.6^b$   | $3.5 \pm 0.4$<br>$0.2 \pm 0.06^b$                  |
| NphB M30  | $1.05 \pm 0.05$                               | $0.200 \pm 0.04$                     | $4.2 \pm 0.9$                                      |
| NphB M31  | $1.30 \pm 0.05$<br>$6.0 \pm 0.8^b$            | $0.12 \pm 0.02^*$<br>$1.8 \pm 0.5^b$ | $10.8 \pm 2.1$<br>$3.3 \pm 1^b$                    |

Each construct was evaluated for its CBGA production with olivetolate (OA) as a substrate. WT, M23 and M31 were evaluated with divarinic acid as well. The symbol (<sup>b</sup>) indicates that divarinic acid was the substrate. Source data are provided as a Source Data file.

Supplementary Table 6: Primers used in this study

| Primer direction                                  | Primer sequence (5'->3')                                   |
|---------------------------------------------------|------------------------------------------------------------|
| For amplification of CBDAS without signal peptide |                                                            |
| Forward                                           | ctcgagaagagagaggctgaagcatcgatgaatcccagagagaacttcttaagtgttc |
| Reverse                                           | atcctctctgagatgagttttgttctaggaatgcctgtgcctaggtagaggggtat   |
| For amplification of Gs PTA                       |                                                            |
| Forward                                           | ggtgccgcgcggcagccatatgacaaccgattatttacggcattaaaagc         |
| Reverse                                           | cgcagtcgctggggagtaactcgagcaccaccaccaccactg                 |

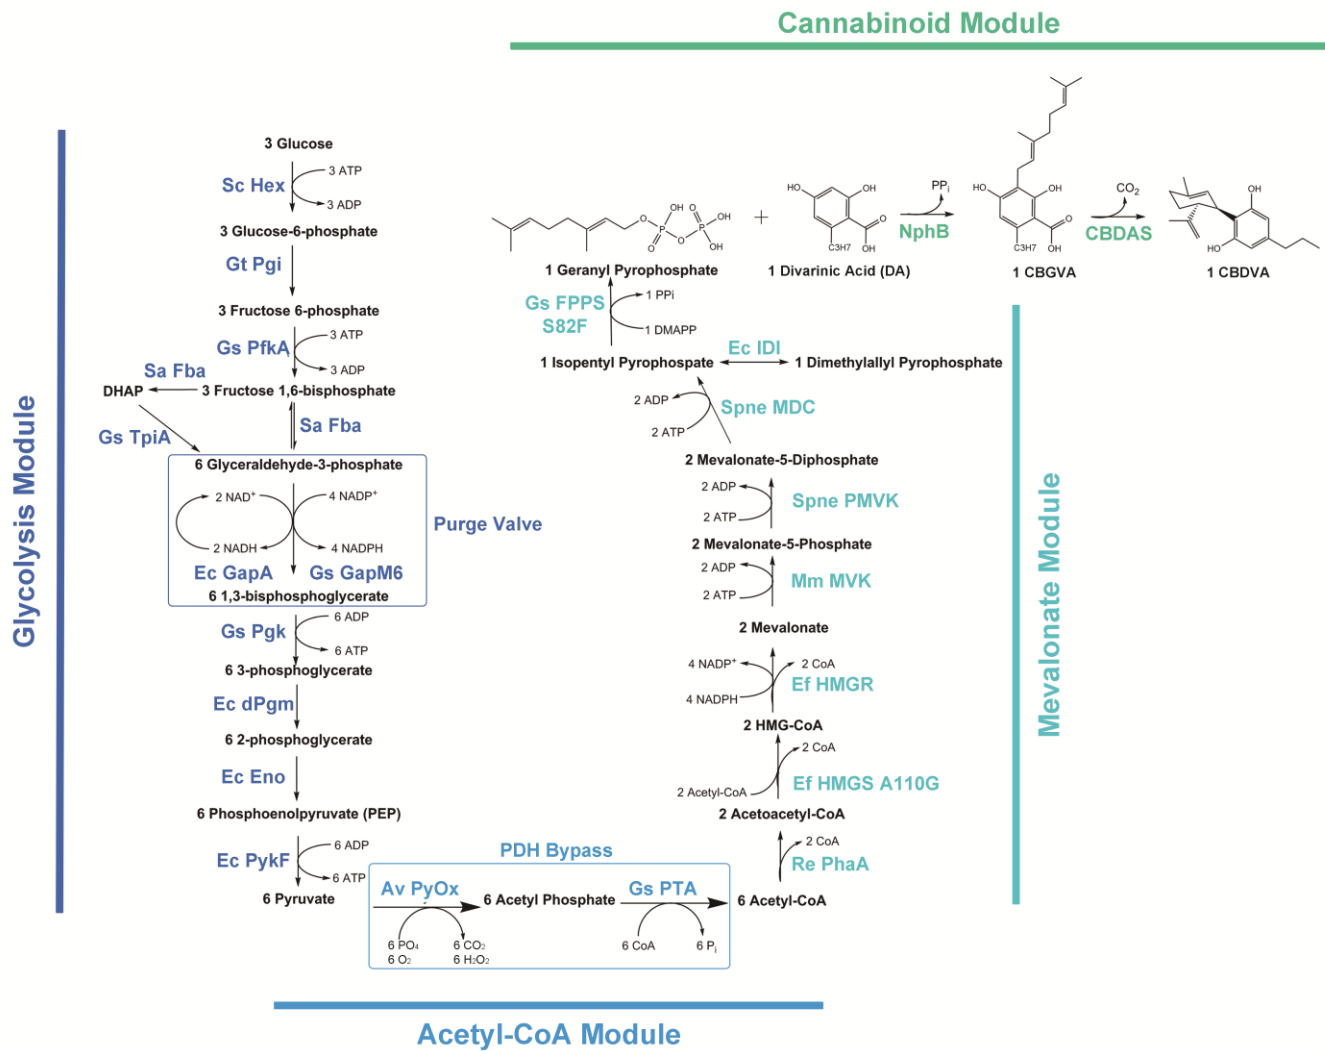

Supplementary Figure 1: Full reaction schematic for the enzymatic synthesis of cannabinoids. Glucose is broken down to pyruvate through a modified glycolysis pathway (dark blue) that includes a purge valve system. The purge valve (boxed) allows carbon flux to continue through the glycolysis pathway without building up excess NADPH. Pyruvate is converted to acetyl-CoA through the PDH bypass outlined in light blue. Acetyl-CoA is then converted into GPP via the mevalonate pathway (aqua). Finally, the GPP from the mevalonate pathway is used to prenylate aromatic polyketide. Shown here is the prenylation of olivetolate to produce CBGA; however, olivetolate could be replaced with a wide range of aromatic substrates to generate various prenylated products. A prenylated product like CBGA can be converted into a variety of cannabinoids. An example of the conversion of CBGA into CBD by the action of CBDAS and a spontaneous decarboxylation is shown.

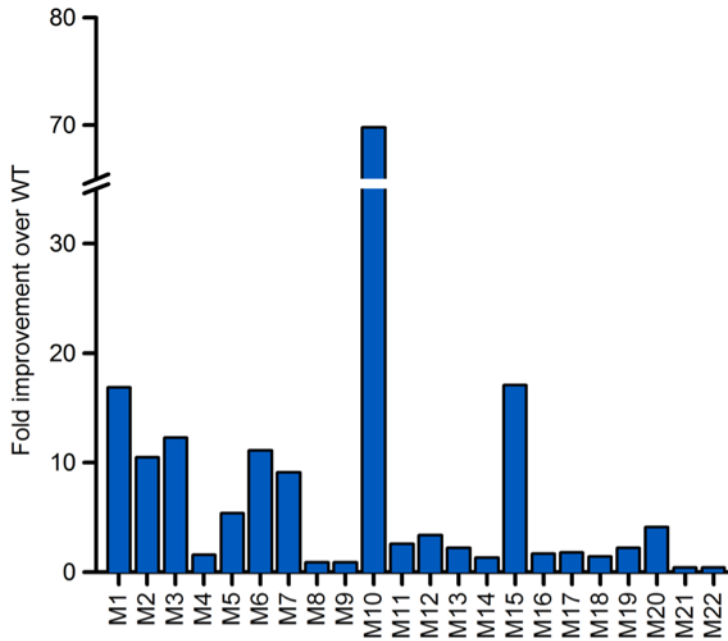

Supplementary Figure 2: Activity screen of NphB constructs. NphB constructs from the initial round were expressed and purified and assayed for CBGA production. The constructs are shown on the x-axis, and their activity relative to WT activity is shown on the y-axis. Source data are provided as a Source Data file.

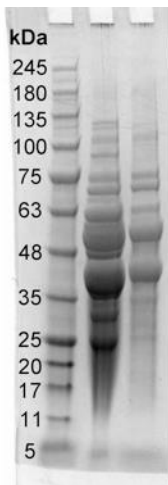

Supplementary Figure 3: SDS-PAGE analysis of CBGA cell-free system precipitate. Lane 1: 1 kb DNA ladder from BioPioneer. Lane 2: Enzyme mastermix before it was added to the reaction. Lane 3: The washed precipitate from the reaction at 24 hours.

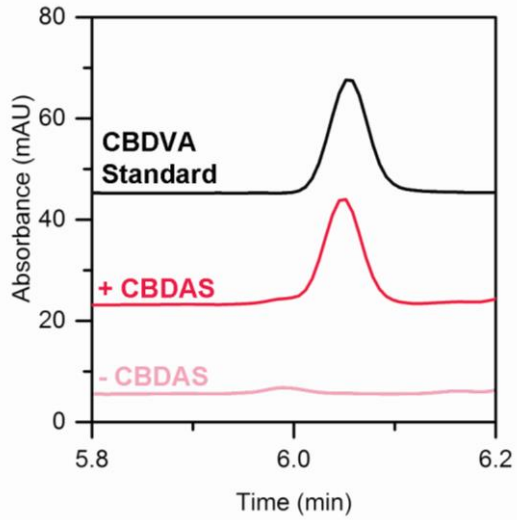

Supplementary Figure 4: Cannabidiolic acid synthase (CBDAS) converts CBGVA into CBDVA. HPLC chromatogram of reaction extracts of CBGVA in the presence (red) and absence (pink) of CBDAS compared to a CBDVA standard (black). Source data are provided as a Source Data file.

NphB - C10 Prenyl-Products  
M+ 401.12

Substrate: Apigenin

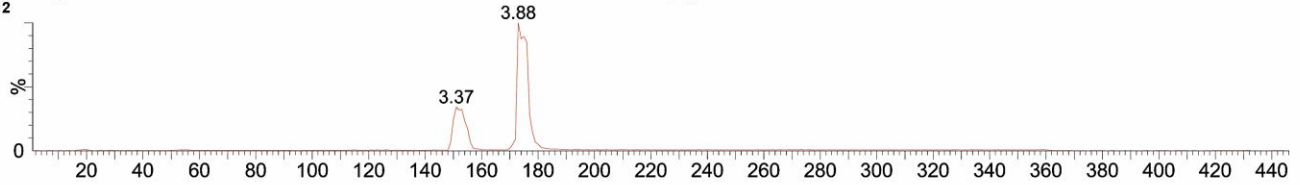

NovQ - C5 Prenyl-Products  
M+ 407.18

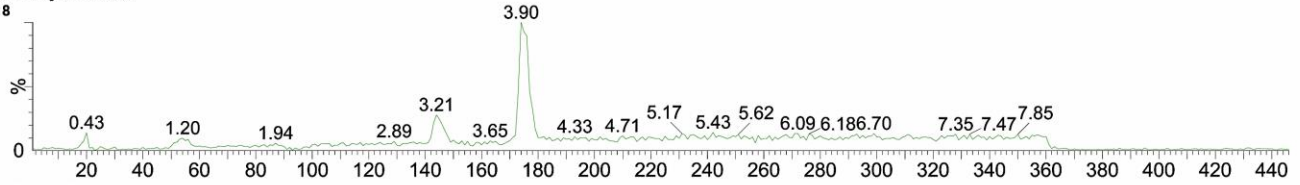

NovQ - C5 Prenyl-Products  
M+ 339.12

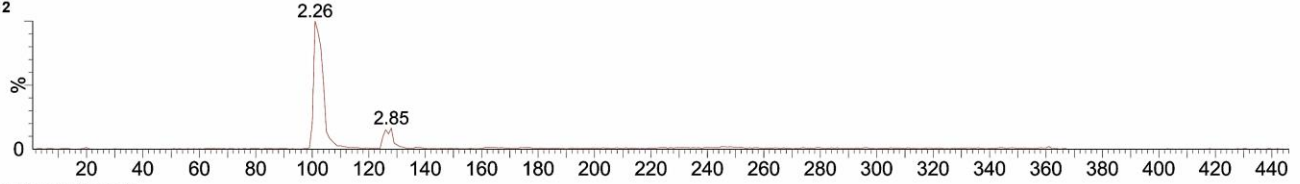

AtaPT - C5 Prenyl-Products  
M+ 407.18

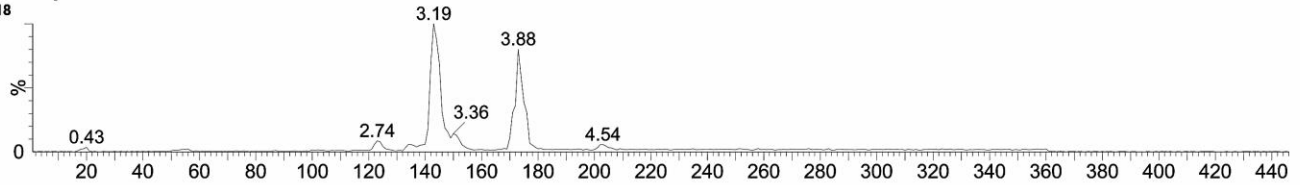

AtaPT - C5 Prenyl-Products  
M+ 339.12

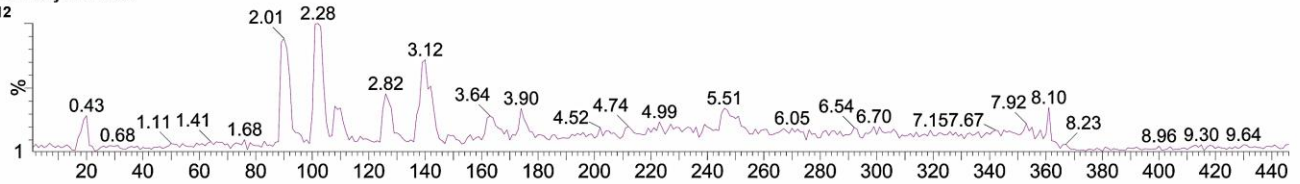

Scan

Supplementary Figure 5: LC-MS chromatogram with extracted for masses corresponding to prenyl-apigenin products. Each panel is labeled for the enzyme that produced the prenyl-products, and the m/z that corresponds to the prenyl-products. AtaPT and NovQ demonstrate both mono and di-prenylation.

Substrate: Daidzein

NphB - C10 Prenyl-Products  
M+ 391.2

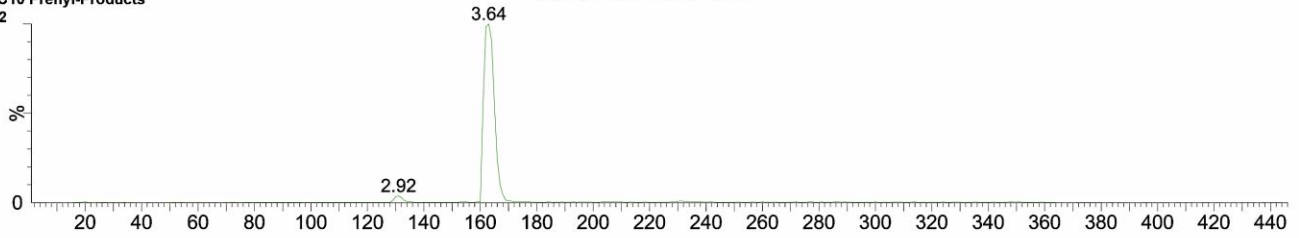

NovQ - C5 Prenyl-Products  
M+ 391.18

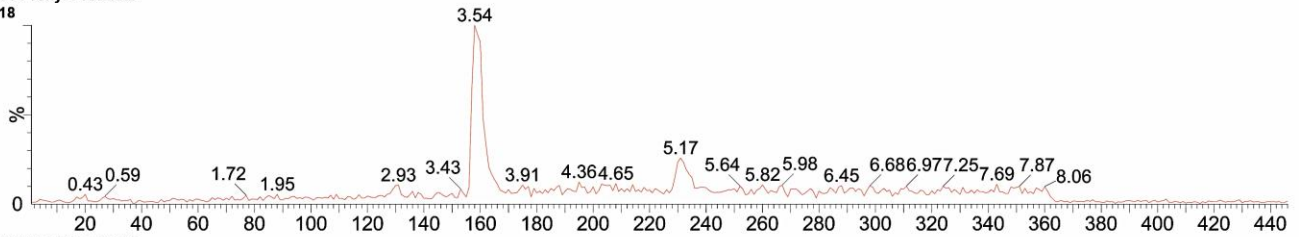

NovQ - C5 Prenyl-Products  
M+ 323.12

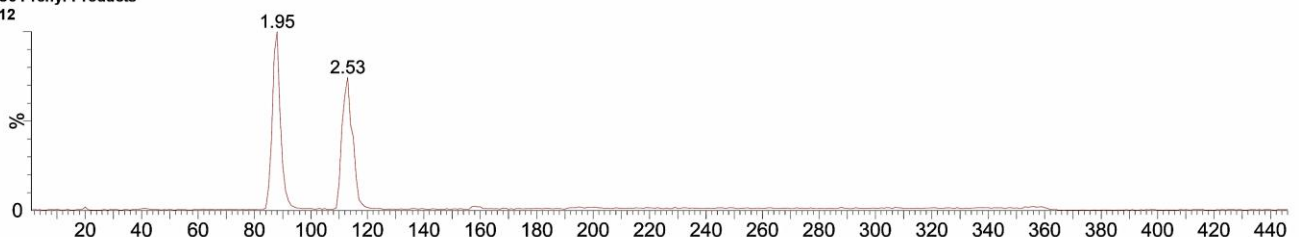

AtaPT - C5 Prenyl-Products  
M+ 391.18

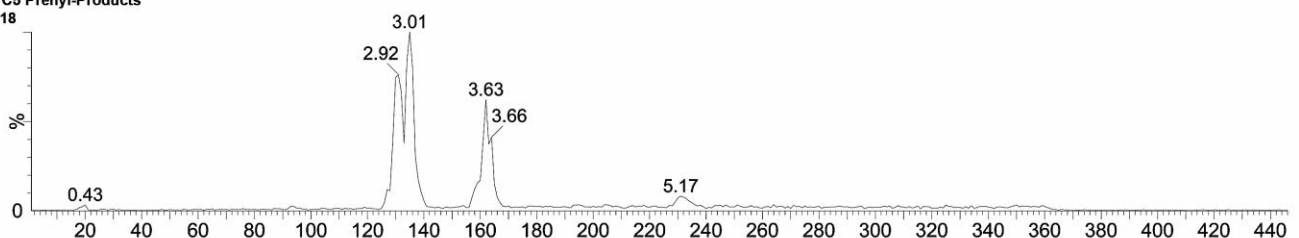

Scan

Supplementary Figure 6: LC-MS chromatogram with extracted for masses corresponding to prenyl-daidzein products. Each panel is labeled for the enzyme that produced the prenyl-products, and the m/z that corresponds to the prenyl-products. NovQ demonstrate both mono and di-prenylation, whereas AtaPT demonstrates only diprenylation.

Substrate: Genistein

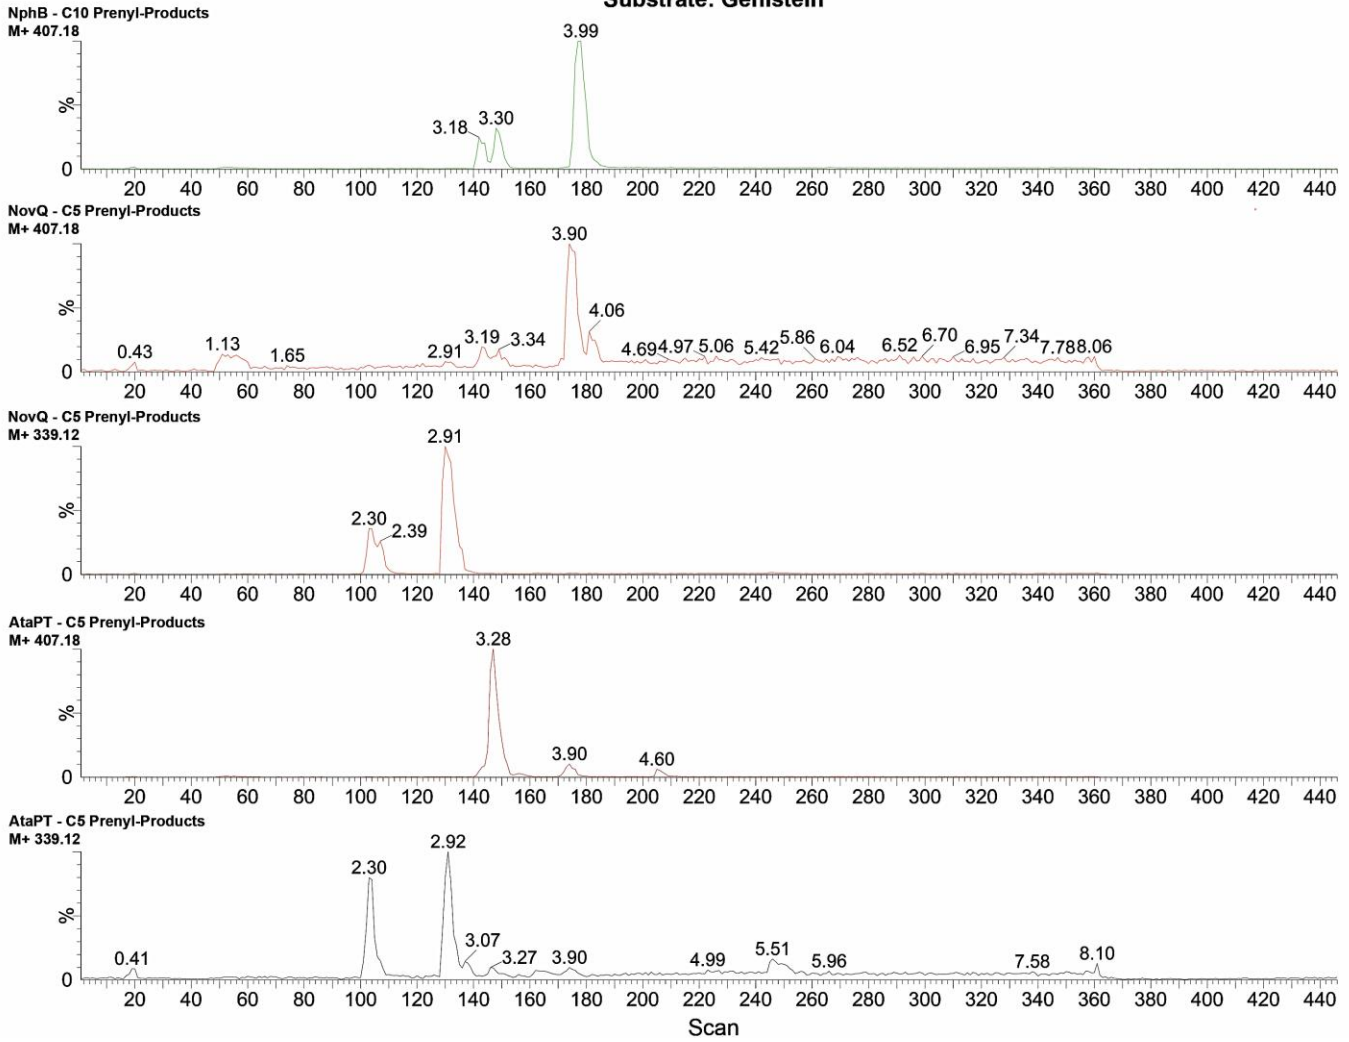

Supplementary Figure 7: LC-MS chromatogram with extracted for masses corresponding to prenyl-genistein products. Each panel is labeled for the enzyme that produced the prenyl-products, and the m/z that corresponds to the prenyl-products. AtaPT and NovQ demonstrate both mono and di-prenylation.

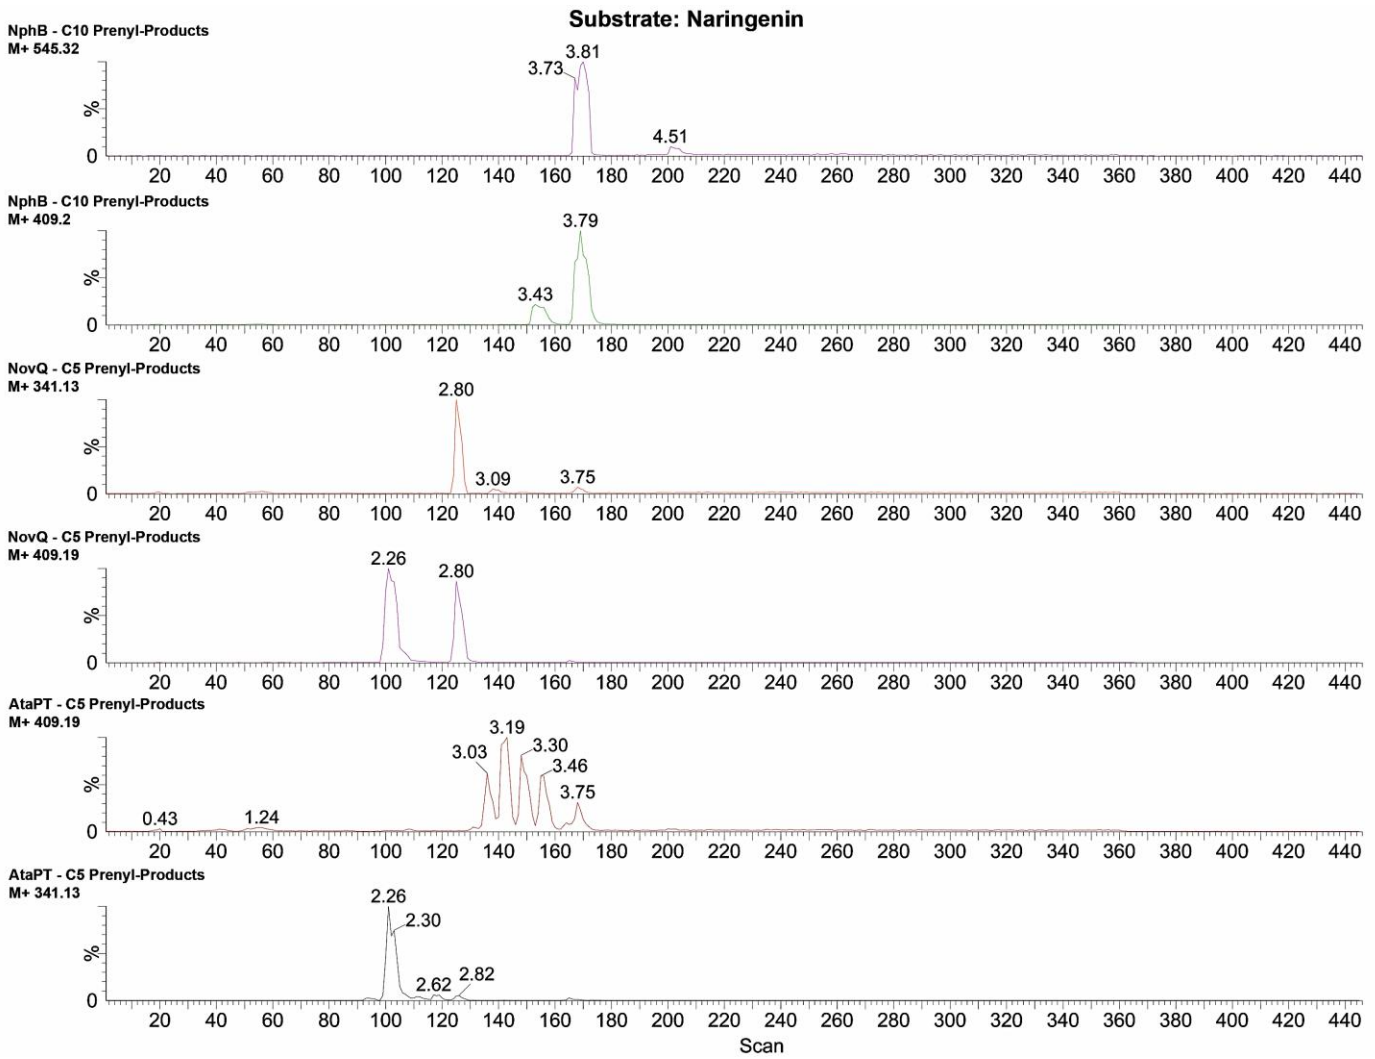

Supplementary Figure 8: LC-MS chromatogram with extracted for masses corresponding to prenyl-naringenin products. Each panel is labeled for the enzyme that produced the prenyl-products, and the m/z that corresponds to the prenyl-products. AtaPT and NovQ demonstrate both mono and di-prenylation, NphB demonstrated both mono and di-geranylation.

NphB - C10 Prenyl-Products  
M+ 317.25

Substrate: Olivetol

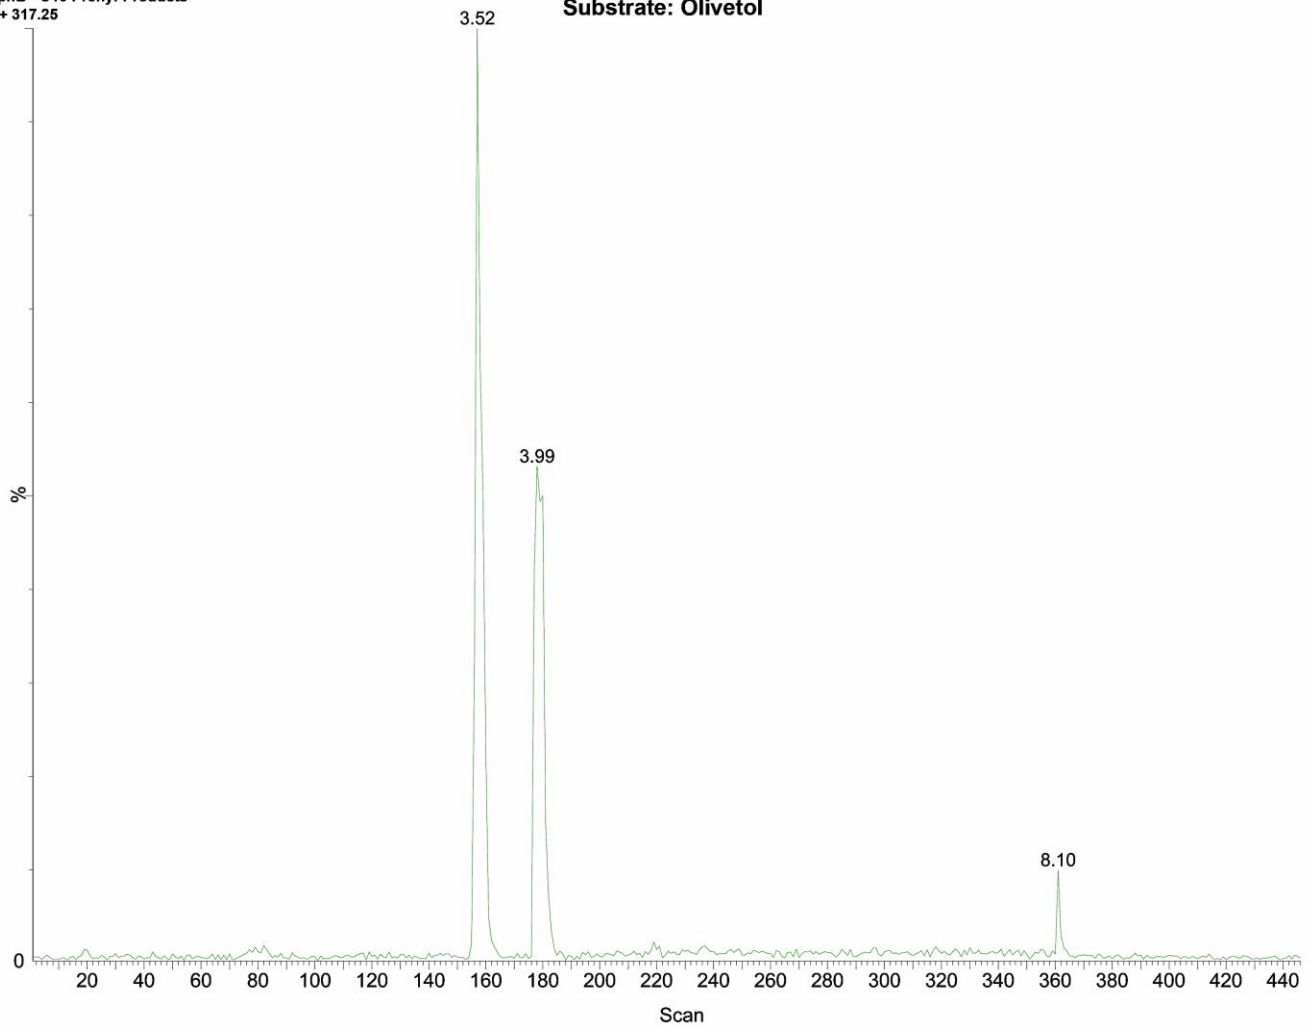

Supplementary Figure 9: LC-MS chromatogram with extracted for masses corresponding to prenyl-olivetol products. This panel is labeled with the enzyme that produced the prenyl-products, and the m/z that corresponds to the prenyl-products.

Substrate: Resveratrol

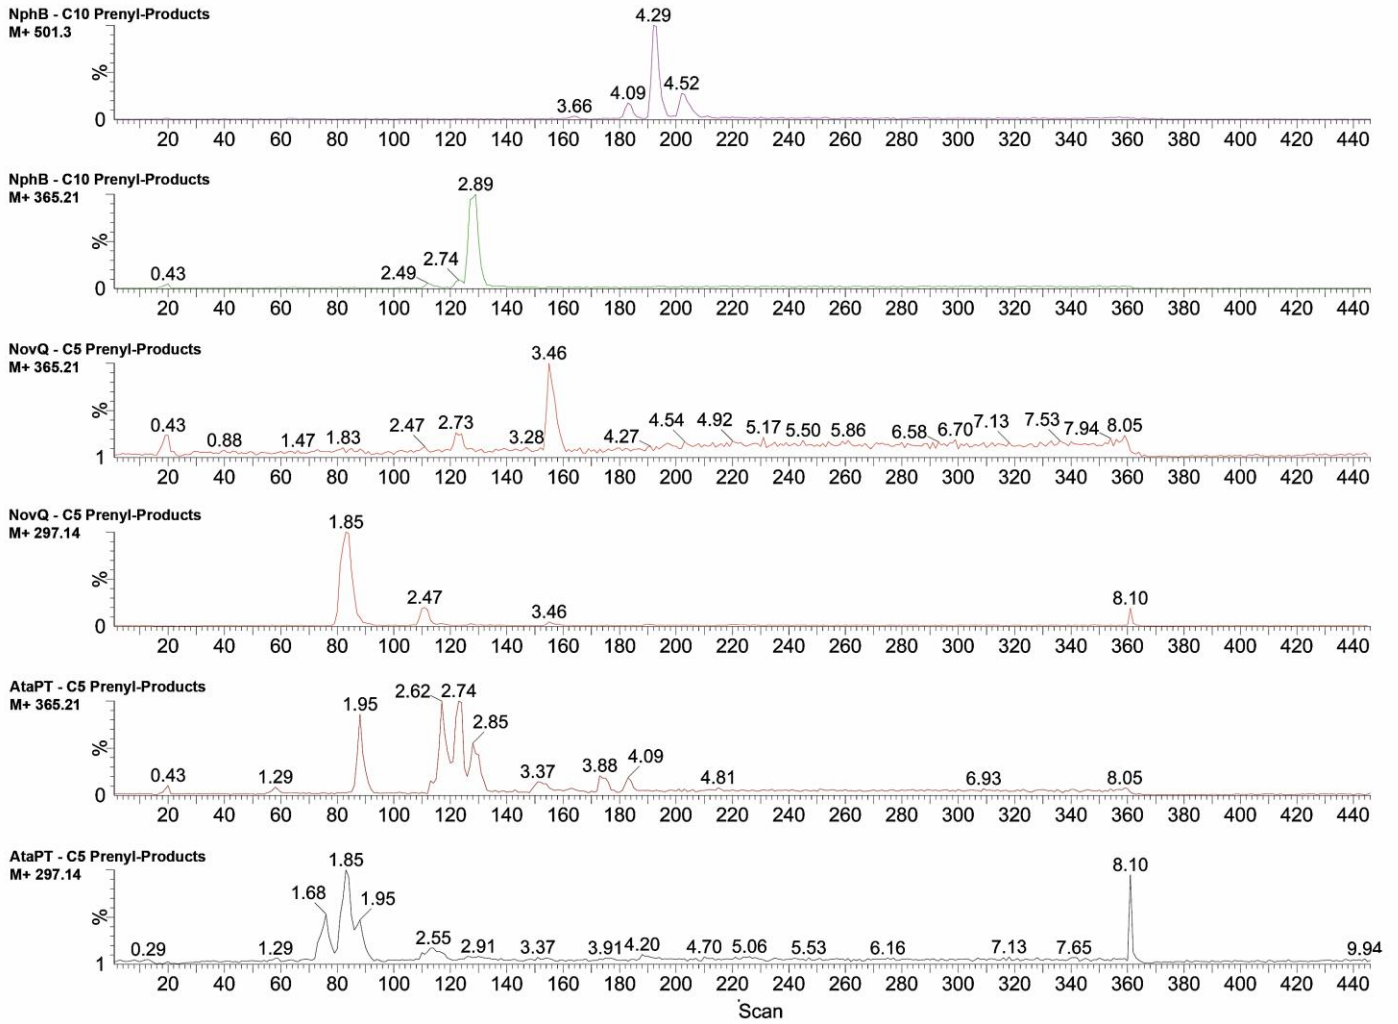

Supplementary Figure 10: LC-MS chromatogram with extracted for masses corresponding to prenyl-resveratrol products. Each panel is labeled for the enzyme that produced the prenyl-products, and the m/z that corresponds to the prenyl-products. AtaPT and NovQ demonstrate both mono and di-prenylation, and NphB demonstrates both mono and di-geranylation.

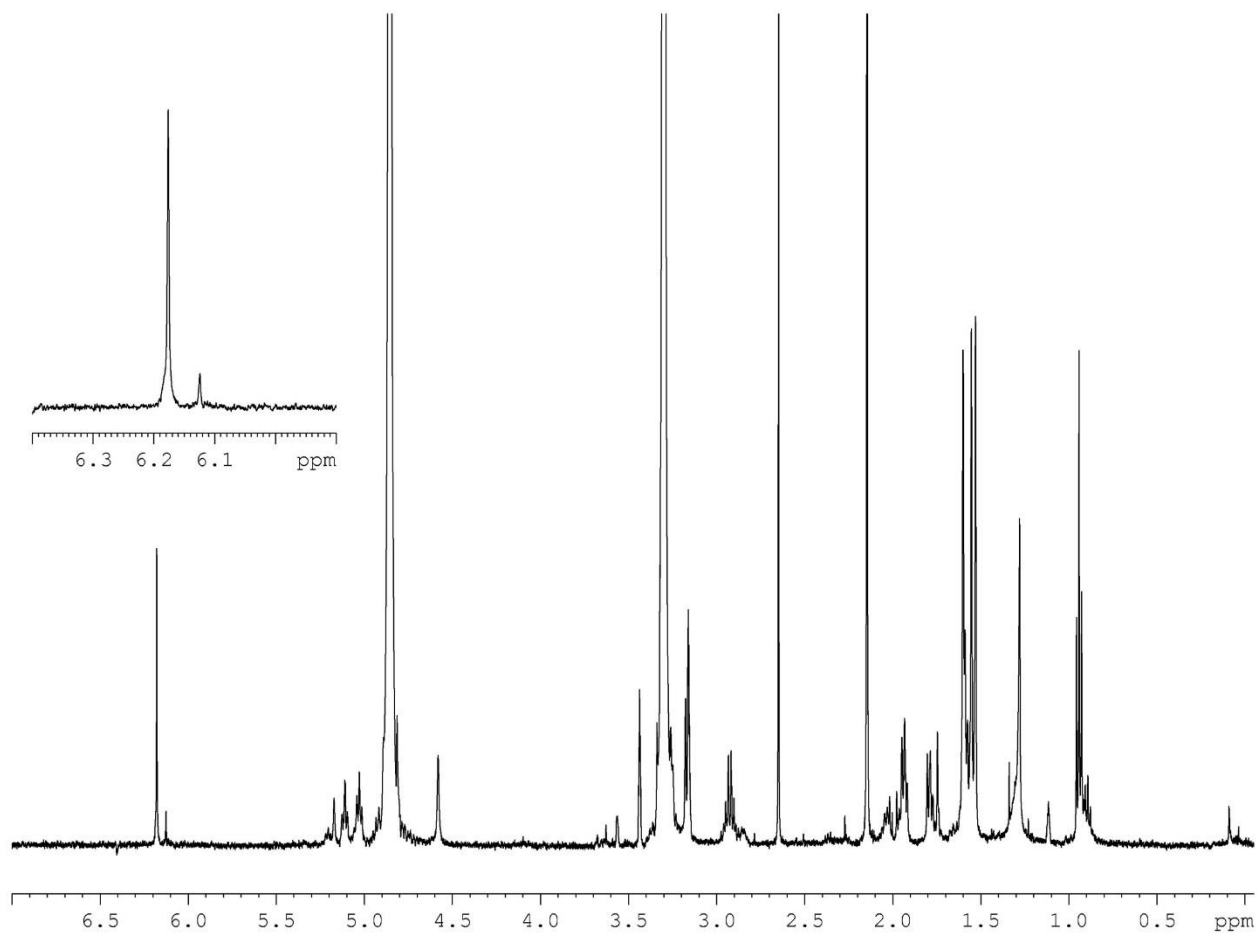

Supplementary Figure 11: Proton NMR Spectrum of CBGVA in CD<sub>3</sub>OD. The entire spectra is displayed, and the inset zooms in on the aromatic proton at ~6.2 ppm.
