# Supplementary material for: A cell-free platform for the prenylation of natural products and application to cannabinoid production
Source: Springer Nature journal article supplement (doi:10.1038/s41467-019-08448-y), 2019-02-04
Supplement: MOESM6 [file 41467_2019_8448_MOESM6_ESM.pdf]

## **Description of Additional Supplementary Files**

File Name: Supplementary Data 1

Description: Gene blocks used in this work
