# Supplementary material for: A cell-free platform for the prenylation of natural products and application to cannabinoid production
Source: Nat Commun. 2019 Feb 4;10:565. doi: 10.1038/s41467-019-08448-y (PMC6362252; doi:10.1038/s41467-019-08448-y)
Supplement: Supplementary file 4 — Supplementary Data 1 [file 41467_2019_8448_MOESM4_ESM.xlsx]

## Sheet: Sheet1
> AtaPT
ATGGGCAGCAGCCATCATCACCACCATCACAGCAGCGGCCTGGTGCCGCGCGGCAGCCATATGCTTCCTCCAAGTGATTCTAAAGACCCACGCCCCTGGCAAATTTTGTCACAAGCTCTTGGCTTTCCAAATTATGACCAAGAGCTGTGGTGGCAGAACACGGCGGAAACACTTAACCGTGTCCTGGAACAGTGTGACTATTCGGTCCACTTGCAATATAAGTACCTTGCCTTCTATCATAAGTACATTCTTCCTTCGTTAGGACCATTTCGTCGTCCAGGTGTGGAGCCCGAATATATCAGCGGATTATCACATGGTGGGCACCCATTAGAGATCAGTGTGAAAATCGACAAATCCAAAACGATCTGTCGCCTTGGGTTACAGGCAATCGGGCCGCTT…
> NovQ
CATCACAGCAGCGGCCTGGTGCCGCGCGGCAGCCATATGCCAGCTTTACCCATGAATCAAGAGTTTGACCGTGAACGTTTCCGCGTTGATCTTCGCGCTACAGCGGCTGCGATTGGAGCACCTGTCACGCCCCGCGTAACGGATACAGTGTTAGAAACCTTCCGCGATAACTTCGCGCAAGGCGCAACTTTATGGAAAACAACTTCACAGCCGGGAGATCAACTGTCCTATCGTTTTTTTAGCCGCTTGAAAATGGACACCGTGGGACGTGCAGTTGATGCAGGACTTCTGGACGGGACACATCCCACAGTCCCCATCGTAGAAGACTGGTCGGATTTGTACGGAGGAACACCGGTCCAGTCGGCTGATTTCGATGCTGGTCGTGGTATGGCTAAAACC…
> NphB
CATCACAGCAGCGGCCTGGTGCCGCGCGGCAGCCATATGTCCGAGGCGGCCGACGTGGAGCGTGTTTATGCTGCTATGGAAGAAGCTGCGGGTCTGCTGGGAGTGGCATGTGCTCGTGATAAGATTTATCCCCTTCTTTCAACCTTCCAGGATACATTGGTTGAAGGTGGCAGTGTGGTAGTGTTTAGCATGGCTAGTGGACGCCACAGCACGGAACTGGACTTTAGTATTTCAGTACCCACGTCCCATGGTGACCCATACGCAACTGTCGTCGAAAAGGGGCTGTTCCCTGCAACAGGCCATCCTGTTGACGATCTTTTGGCTGATACGCAGAAGCACCTGCCTGTTTCTATGTTCGCCATTGATGGAGAAGTCACCGGAGGTTTCAAAAAAACTTAT…
> CBDAS Synthase
GTGGCCCAGCCGGCCGTCTCGGATCGGTACATGAAGTGTTCCACCTTTTCATTTTGGTTCGTATGCAAAATAATTTTCTTCTTTTTTTCCTTTAACATCCAGACATCAATTGCCAATCCCAGAGAGAACTTTCTTAAGTGTTTCTCCCAGTACATACCTAACAATGCTACAAACCTGAAGTTGGTTTATACTCAAAATAATCCCCTGTATATGTCTGTGCTAAACTCTACCATCCATAATCTTAGGTTCTCCAGTGATACAACCCCCAAACCCCTAGTAATAGTAACTCCATCTCATGTGAGTCATATTCAAGGAACCATTCTGTGCTCAAAAAAGGTTGGCCTTCAAATTCGTACCAGGTCTGGTGGCCATGACTCCGAAGGCATGTCTTATATTTCT…
