# Supplementary material for: A cell-free platform for the prenylation of natural products and application to cannabinoid production
Source: Nat Commun. 2019 Feb 4;10:565. doi: 10.1038/s41467-019-08448-y (PMC6362252; doi:10.1038/s41467-019-08448-y)
Supplement: Supplementary file 5 — Source Data [file 41467_2019_8448_MOESM5_ESM.xlsx]

## Sheet: Fig 2A
Figure 2A
	PDH Bypass		PDH System
DHN Concentration (mM)	Titer (mg/L)	Standard Deviation (mg/L)	Titer (mg/L)	Standard Deviation (mg/L)
0.5	212.155	7.13629	134.728	14.2004
1	336.013	26.3765	218.813	29.8732
2.5	448.507	127.069	402.142	12.4537
5	681.313	50.292	217.416	38.3612

## Sheet: Fig 2B
Figure 2B
Aromatic Molecule	PDH Activity (mM/min)	Standard Deviation (mM/min)
No Molecule	0.09402	0.00663
1,6 DHN 1mM	0.04267	0.00696
Resveratrol 1 mM	0.04512	0.00608
Olivetol 1mM	0.05114	0.00819
Olivetolate 1mM	0.09742	0.01034
Olivetolate 5mM	0.02928	0.00463
Ethanol	0.12812	0.02972

## Sheet: Fig 2C
Figure 2C
	NphB		AtaPT		NovQ
Aromatic Molecule	Titer (mg/L)	Standard Deviation (mg/L)	Titer (mg/L)	Standard Deviation (mg/L)	Titer (mg/L)	Standard Deviation (mg/L)
Apigenin	0	0	0	0	41.0984	25.6409
Daidzein	17.9959	8.75268	0	0	135.447	27.031
Genestein	114.442	27.1941	68.5475	29.4284	137.216	23.6196
Naringenin	189.588	1.26709	174.379	24.3668	288.293	3.07537
Resveratrol	23.9758	11.1422	92.4104	32.9172	87.4897	20.737
Olivetol	32.3303	11.2724	0	0	0	0
Olivetolate	37.3905	4.9761	0	0	0	0
1,6 DHN	542.232	25.2	0	0	0	0

## Sheet: Fig 2D
Figure 2D
1,6 DHN (5-prenyl-1,6-DHN Product)			Olivetolate (CBGA Product)
Time (Hours)	Titer (mg/L)	Standard Deviation (mg/L)	Time (hours)	Titer (mg/L)	Standard Deviation (mg/L)
6	8.468	7.2	4	0.93576	0.60813
12	162.299	49.1	8	8.69455	0.92695
24	542.232	25.2	14	20.7382	0.27256
48	705.231	12.14	24	37.3905	4.9761
72	687.4	18.2	48	92.6659	8.57206
			72	111.741	3.96558
			90	131.818	2.5713

## Sheet: Fig 3B
Figure 3B
	Fold Improvement Over WT NphB	Standard Deviation Fold Improvement
M1	28.201	5.05562
M3	16.3151	2.03468
M10	151.363	11.3867
M15	10.488	0.53842
M23	181.045	22.5762
M24	148.211	12.887
M25	109.059	12.2576
M27	154.888	8.8844
M30	175.513	12.7395
M31	178.41	13.3438

## Sheet: Fig 3C
Figure 3C
CBGA Standard		M23 NphB		WT NphB
Time (min)	Normalized Counts	Time (min)	Normalized Counts	Time (min)	Normalized Counts
9.509	0.11629	9.508	0.04405	9.503	0.07957
9.525	0.12116	9.525	0.0453	9.519	0.08075
9.542	0.13326	9.541	0.04562	9.536	0.0811
9.559	0.13944	9.558	0.04724	9.553	0.08287
9.576	0.13992	9.575	0.04768	9.569	0.08546
9.592	0.13686	9.591	0.04765	9.586	0.08514
9.609	0.13532	9.608	0.04808	9.603	0.0857
9.626	0.13467	9.625	0.04845	9.619	0.08732
9.642	0.13629	9.641	0.04947	9.636	0.08962
9.659	0.14361	9.658	0.07519	9.653	0.09667
9.676	0.14883	9.675	0.06256	9.669	0.13684
9.692	0.15548	9.691	0.05239	9.686	0.09814
9.709	0.15468	9.708	0.0533	9.703	0.0956
9.726	0.15811	9.725	0.05404	9.72	0.09809
9.742	0.16848	9.741	0.0562	9.736	0.09733
9.759	0.18278	9.758	0.06167	9.753	0.10141
9.776	0.18694	9.775	0.05719	9.77	0.10089
9.792	0.18453	9.791	0.05768	9.786	0.10149
9.809	0.17802	9.808	0.0579	9.803	0.10228
9.826	0.17189	9.825	0.05852	9.82	0.10422
9.843	0.16908	9.842	0.05925	9.836	0.10556
9.859	0.1702	9.858	0.0615	9.853	0.10778
9.876	0.18195	9.875	0.0635	9.87	0.10783
9.893	0.17973	9.892	0.06272	9.886	0.11078
9.909	0.18116	9.908	0.06202	9.903	0.1113
9.926	0.17991	9.925	0.06382	9.92	0.11383
9.943	0.18413	9.942	0.07403	9.936	0.11449
9.959	0.19002	9.958	0.07555	9.953	0.12001
9.976	0.19063	9.975	0.06838	9.97	0.11837
9.993	0.19024	9.992	0.06972	9.987	0.11851
10.009	0.19142	10.008	0.0695	10.003	0.12127
10.026	0.1891	10.025	0.07469	10.02	0.12216
10.043	0.23871	10.042	0.18261	10.037	0.13112
10.059	0.23367	10.058	0.17765	10.053	0.16205
10.076	0.19731	10.075	0.09224	10.07	0.14419
10.093	0.19663	10.092	0.09869	10.087	0.13638
10.109	0.19525	10.109	0.10626	10.103	0.15158
10.126	0.19575	10.125	0.08789	10.12	0.15024
10.143	0.19368	10.142	0.08352	10.137	0.14408
10.16	0.19236	10.159	0.08031	10.153	0.14133
10.176	0.19235	10.175	0.08163	10.17	0.14036
10.193	0.19534	10.192	0.08291	10.187	0.14938
10.21	0.19395	10.209	0.08019	10.203	0.14421
10.226	0.19389	10.225	0.08066	10.22	0.14143
10.243	0.19666	10.242	0.08317	10.237	0.14159
10.26	0.19371	10.259	0.08122	10.254	0.142
10.276	0.19407	10.275	0.08124	10.27	0.14341
10.293	0.19945	10.292	0.08471	10.287	0.14791
10.31	0.20142	10.309	0.08765	10.304	0.14663
10.326	0.19837	10.325	0.08346	10.32	0.14838
10.343	0.19737	10.342	0.08505	10.337	0.14708
10.36	0.19635	10.359	0.08649	10.354	0.14957
10.376	0.19715	10.376	0.08713	10.37	0.15769
10.393	0.19711	10.392	0.08493	10.387	0.15445
10.41	0.20184	10.409	0.0868	10.404	0.15276
10.427	0.20918	10.426	0.11767	10.42	0.19655
10.443	0.23502	10.442	0.14577	10.437	1
10.46	0.26245	10.459	0.1361	10.454	0.56679
10.477	1	10.476	1	10.47	0.29538
10.493	0.60998	10.492	0.63431	10.487	0.60035
10.51	0.25335	10.509	0.16489	10.504	0.29161
10.527	0.22893	10.526	0.1365	10.52	0.25571
10.543	0.21868	10.542	0.11965	10.537	0.21483
10.56	0.21299	10.559	0.10598	10.554	0.18808
10.577	0.20876	10.576	0.10258	10.571	0.17972
10.593	0.20626	10.592	0.10008	10.587	0.17627
10.61	0.20746	10.609	0.09895	10.604	0.17326
10.627	0.2055	10.626	0.0983	10.621	0.17256
10.643	0.20586	10.642	0.09615	10.637	0.17257
10.66	0.20639	10.659	0.09788	10.654	0.17284
10.677	0.20514	10.676	0.09731	10.671	0.1726
10.694	0.20452	10.693	0.09658	10.687	0.17156
10.71	0.20488	10.709	0.09902	10.704	0.17198
10.727	0.20536	10.726	0.10139	10.721	0.17194
10.744	0.2046	10.743	0.15852	10.737	0.17223
10.76	0.20576	10.759	0.20657	10.754	0.21445
10.777	0.20542	10.776	0.11953	10.771	0.20211
10.794	0.20473	10.793	0.1063	10.787	0.17796
10.81	0.2021	10.809	0.10305	10.804	0.17577
10.827	0.2027	10.826	0.10227	10.821	0.17695
10.844	0.20116	10.843	0.10175	10.838	0.17477
10.86	0.20001	10.859	0.10094	10.854	0.17604
10.877	0.20158	10.876	0.10113	10.871	0.17297
10.894	0.20272	10.893	0.10158	10.888	0.17524
10.91	0.20158	10.909	0.10134	10.904	0.17668
10.927	0.19853	10.926	0.10017	10.921	0.17638
10.944	0.20138	10.943	0.1005	10.938	0.17641
10.96	0.19632	10.96	0.10049	10.954	0.17601
10.977	0.1964	10.976	0.10086	10.971	0.17365
10.994	0.19748	10.993	0.10124	10.988	0.1738
11.01	0.1971	11.01	0.10186	11.004	0.17548

## Sheet: Fig 4A
Figure 4A
	WT NphB - CBGA		M23 NphB - CBGA		M31 NphB - CBGVA
Time (Hours)	Titer (g/L)	Stand Dev (g/L)	Titer (g/L)	Stand Dev (g/L)	Time (Hours)	Titer (g/L)	Stnd Dev (g/L)
3	5e-05	0.02496	0.0007	0.00045967	6	0.17857	0.04987
6	0.0021	0.92293	0.19517	0.05061	9	0.48695	0.05852
9.3	0.00398	1.35292	0.28683	0.03182	12	0.82192	0.05242
12	0.00465	0.64096	0.51227	0.11539	27	1.48411	0.04366
24.3	0.01032	1.29437	0.74389	0.03359	49	1.73977	0.08825
49.5	0.02205	3.23603	0.68149	0.03964
73.5	0.03025	0.82921	0.68149	0.02755
97.5	0.03558	3.55622	0.64825	0.07295

## Sheet: Fig 4C
Figure 4C
Time (Hours)	Titer (mg/L)	Standard Deviation (mg/L)
13.5	3.31029	0.39761
23	5.22369	0.43747
47	13.8356	0.80039
70	19.6598	1.1226
95	25.7605	1.23299

## Sheet: Supplementary Figure 2
Supplementary Figure 2
Construct	Fold Improvement over WT	Stnd Dev Fold Improvement
M1	16.9	0.9
M2	10.5	4.7
M3	12.3	4.1
M4	1.6	1.7
M5	5.4	1.5
M6	11.1	2.8
M7	9.1	3
M8	0.9	0.5
M9	0.9	0.1
M10	69.8	15.4
M11	2.6	0.4
M12	3.4	0.7
M13	2.2	1.5
M14	1.3	0.1
M15	17.1	3.6
M16	1.7	0.6
M17	1.8	0.5
M18	1.4	0.1
M19	2.2	1
M20	4.1	0.3
M21	0.4	0.2
M22	0.4	0.1

## Sheet: Supplementary Figure 4
Supplementary Figure 4
Time	Absorbance (mAU) No CBDAS	Absorbance (mAU) + CBDAS	Absorbance (mAU) CBDVA Stnd
5.73838
5.74503	0.52001	0.63112	0.21525
5.75172	0.54097	0.63112	0.23223
5.75837	0.54482	0.66156	0.2467
5.76505	0.56675	0.64943	0.23483
5.7717	0.52464	0.62972	0.23749
5.77838	0.52107	0.64717	0.24485
5.78503	0.53476	0.62083	0.24843
5.79172	0.52223	0.62678	0.2378
5.79837	0.52759	0.65213	0.23537
5.80505	0.51741	0.64062	0.24351
5.8117	0.55242	0.62969	0.23302
5.81838	0.53697	0.62326	0.2473
5.82503	0.53724	0.65179	0.25874
5.83172	0.53382	0.66815	0.22974
5.83837	0.54235	0.67236	0.22293
5.84505	0.5568	0.6843	0.21939
5.8517	0.58059	0.69924	0.23206
5.85838	0.58503	0.7064	0.24251
5.86503	0.60239	0.69717	0.25059
5.87172	0.62844	0.72265	0.24499
5.87837	0.63809	0.73449	0.23948
5.88505	0.62256	0.75524	0.25231
5.8917	0.61946	0.7574	0.2356
5.89838	0.60317	0.76879	0.23985
5.90503	0.60842	0.75096	0.25353
5.91172	0.59745	0.72258	0.25331
5.91837	0.60558	0.72368	0.25439
5.92505	0.65231	0.71109	0.25255
5.9317	0.684	0.73977	0.25014
5.93838	0.7566	0.771	0.22446
5.94503	0.81293	0.80101	0.25556
5.95172	0.96018	0.84611	0.24883
5.95837	1.18524	0.94657	0.24366
5.96505	1.42369	1.0989	0.2523
5.9717	1.65149	1.3291	0.24725
5.97838	1.77088	1.56574	0.27424
5.98503	1.76506	1.80455	0.25596
5.99172	1.60264	1.90864	0.2726
5.99837	1.37646	2.04557	0.25261
6.00505	1.15161	2.43086	0.2546
6.0117	0.96435	3.54008	0.28958
6.01838	0.83238	5.86479	0.38054
6.02503	0.73487	9.51948	0.66251
6.03172	0.67086	14.0537	1.43263
6.03837	0.6887	18.4318	3.14962
6.04505	0.6609	21.2496	6.13363
6.0517	0.63928	21.5036	10.4543
6.05838	0.61098	18.9416	15.4171
6.06503	0.57135	14.5808	19.9212
6.07172	0.5699	9.93114	22.6086
6.07837	0.55702	6.18065	22.4744
6.08505	0.543	3.7345	19.5402
6.0917	0.56293	2.33444	14.7854
6.09838	0.58465	1.60708	9.86841
6.10503	0.57085	1.23324	5.98688
6.11172	0.57084	1.02724	3.48141
6.11837	0.6597	0.92755	2.10323
6.12505	0.7383	0.89679	1.36348
6.1317	0.86073	0.9342	0.98798
6.13838	0.94732	1.02436	0.8121
6.14503	1.06148	1.08589	0.67312
6.15172	1.10978	1.18221	0.606
6.15837	1.10583	1.23411	0.53796
6.16505	1.03558	1.26285	0.48141
6.1717	1.0073	1.2424	0.46436
6.17838	1.00614	1.2149	0.43451
6.18503	1.09678	1.23846	0.40648
6.19172	1.44716	1.42603	0.37256
6.19837	2.48912	1.71592	0.37468
6.20505	6.01837	2.42939	0.36462
6.2117	18.8154	4.35999	0.35356
6.21838	60.4738	10.8771	0.34852
6.22503	169.142	33.5789	0.33004
6.23172	381.846	101.168	0.34776
6.23837	683.114	257.687	0.32619
6.24505	974.874	524.003	0.30231
6.2517	1131.54	846.819	0.31562
6.25838	1095.85	1101.34	0.31536
6.26503	906.199	1179.71	0.32768
6.27172	652.081	1067.52	0.33525
6.27837	417.181	832.445	0.34982
6.28505	245.544	568.851	0.37869
6.2917	139.876	349.476	0.41683
6.29838	81.4357	200.549	0.43089
6.30503	50.4762	113.693	0.43
6.31172	33.6046	66.9641	0.40807
6.31837	24.1179	42.2276	0.41447
6.32505	18.2743	28.9318	0.38988
6.3317	14.3931	21.1996	0.37725
6.33838	11.7046	16.2389	0.34903
6.34503	9.79444	12.9758	0.35259
6.35172	8.34396	10.7709	0.32116
6.35837	7.27435	9.12281	0.30636
6.36505	6.4226	7.86219	0.33013
6.3717	5.71064	6.93009	0.29863
6.37838	5.14185	6.14603	0.31459
6.38503	4.59194	5.49943	0.33566
6.39172	4.05652	4.97141	0.29434
6.39837	3.55043	4.44028	0.31391
6.40505	3.106	3.89076	0.31744
6.4117	2.77222	3.43567	0.27899
6.41838	2.54686	3.05558	0.32587
6.42503	2.37187	2.80284	0.31153
6.43172	2.20212	2.63511	0.29286
6.43837	2.07448	2.50598	0.32194
6.44505	1.90819	2.35138	0.29839
6.4517	1.77812	2.2226	0.29815
6.45838	1.62736	2.04705	0.31647
6.46503	1.50528	1.87673	0.31921
6.47172	1.39401	1.74423	0.28804
6.47837	1.32621	1.63204	0.31215
6.48505	1.25492	1.50936	0.29533
6.4917	1.19063	1.43606	0.29673
6.49838	1.1166	1.38985	0.31325
6.50503	1.12153	1.3497	0.30748
6.51172	1.08115	1.3184	0.31323
6.51837	1.05233	1.29993	0.31156
6.52505	1.03321	1.29058	0.29001
6.5317	0.99913	1.26215	0.29803
6.53838	0.96919	1.1991	0.33614
6.54503	0.94569	1.18716	0.29344
6.55172	0.89262	1.10367	0.3091
6.55837	0.84529	1.06715	0.32066
6.56505	0.78802	1.02217	0.32694
6.5717	0.78903	0.97256	0.33153
6.57838	0.80434	0.93851	0.30901
6.58503	0.90877	0.95333	0.31442
6.59172	1.07791	1.04814	0.30686
6.59837	1.22928	1.18145	0.2965
6.60505	1.31694	1.30833	0.3032
6.6117	1.3789	1.41564	0.29465
6.61838	1.45624	1.46899	0.32806
6.62503	1.5673	1.58378	0.33716
6.63172	1.55152	1.68652	0.30679
6.63837	1.46614	1.71629	0.33312
6.64505	1.30202	1.67743	0.33097
6.6517	1.12708	1.55713	0.31265
6.65838	1.03159	1.36528	0.34097
6.66503	0.96059	1.21971	0.34789
6.67172	0.87387	1.14215	0.31831

[truncated: 1 more sheets: Supplementary Table 5]
